# Supplementary material for: Physical Activity and Plasma Glucose Control among Diabetic Patients Attending Outpatients Clinics in Hanoi, Vietnam
Source: MDPI journal article supplement (doi:10.3390/ijerph18031182), 2021-01-29
Supplement: s1 [file s1]

## DATA COLLECTION FORM

| TIME AND LOCATION |                     | ANSWER                                                                                                                                                                                                                                                                                                                                                                                                                                                                                                                                                                                   |                   |
|-------------------|---------------------|------------------------------------------------------------------------------------------------------------------------------------------------------------------------------------------------------------------------------------------------------------------------------------------------------------------------------------------------------------------------------------------------------------------------------------------------------------------------------------------------------------------------------------------------------------------------------------------|-------------------|
| I1                | Location            |                                                                                                                                                                                                                                                                                                                                                                                                                                                                                                                                                                                          |                   |
| I2                | Interviewer         |                                                                                                                                                                                                                                                                                                                                                                                                                                                                                                                                                                                          |                   |
| I3                | Time                | <div style="display: flex; justify-content: space-around; margin-bottom: 5px;"> <span style="border-bottom: 1px solid black; width: 20px; display: inline-block;"></span> <span style="border-bottom: 1px solid black; width: 20px; display: inline-block;"></span> <span style="border-bottom: 1px solid black; width: 20px; display: inline-block;"></span> <span style="border-bottom: 1px solid black; width: 20px; display: inline-block;"></span> </div> <div style="display: flex; justify-content: space-around;"> <span>Date</span> <span>month</span> <span>year</span> </div> |                   |
| I4                | Sign inform consent | Yes                                                                                                                                                                                                                                                                                                                                                                                                                                                                                                                                                                                      | 1                 |
|                   |                     | No                                                                                                                                                                                                                                                                                                                                                                                                                                                                                                                                                                                       | 2 (If No, finish) |
| I5                | Full name           |                                                                                                                                                                                                                                                                                                                                                                                                                                                                                                                                                                                          |                   |
| I6                | Telephone number    | <div style="display: flex; justify-content: space-around; margin-bottom: 5px;"> <span style="border-bottom: 1px solid black; width: 20px; display: inline-block;"></span> <span style="border-bottom: 1px solid black; width: 20px; display: inline-block;"></span> <span style="border-bottom: 1px solid black; width: 20px; display: inline-block;"></span> <span style="border-bottom: 1px solid black; width: 20px; display: inline-block;"></span> </div>                                                                                                                           |                   |

| STAGE 1: GENERAL INFORMATION |                  |                    |                          |
|------------------------------|------------------|--------------------|--------------------------|
| C1                           | Gender           | Male 1<br>Female 2 | <input type="checkbox"/> |
| C2                           | How old are you? | Year               | □□                       |

  

|     |                                       |      |  |
|-----|---------------------------------------|------|--|
| D1  | Duration of diabetic diagnosis (year) |      |  |
| D2  | Hieght (m)                            | □,□□ |  |
| D3  | Weight (kg)                           | □□,□ |  |
| D4  | BMI (kg/m <sup>2</sup> )              | □□,□ |  |
| D5  | Waist circumference (cm)              | □□,□ |  |
| D6  | Hip circumference (cm)                | □□,□ |  |
| D7  | WHR                                   | □□,□ |  |
| D8  | Systolic blood pressure (mmHg)        | □□□  |  |
| D9  | Diatolic blood pressure (mmHg)        | □□□  |  |
| D10 | Fasting plasma glucose (mmol/l)       | □□,□ |  |

## STAGE 2: PHYSICAL ACTIVITY

Next I am going to ask you about the time you spend doing different types of physical activity in a typical week. Please answer these questions even if you do not consider yourself to be a physically active person. Think first about the time you spend doing work. Think of work as the things that you have to do such as paid or unpaid work, study/training, household chores, harvesting food/crops, fishing or hunting for food, seeking employment. *[Insert other examples if needed]*. In answering the following questions ‘vigorous- intensity activities’ are activities that require hard physical effort and cause large increases in breathing or heart rate, ‘moderate-intensity activities’ are activities that require moderate physical effort and cause small increases in breathing or heart rate.

| Questions               | Response                                                                                                                                                                                                                                                                         | Code                                                                    |
|-------------------------|----------------------------------------------------------------------------------------------------------------------------------------------------------------------------------------------------------------------------------------------------------------------------------|-------------------------------------------------------------------------|
| <b>Activity at work</b> |                                                                                                                                                                                                                                                                                  |                                                                         |
| 1                       | Does your work involve vigorous-intensity activity that causes large increases in breathing or heart rate like <i>[carrying or lifting heavy loads, digging or construction work]</i> for at least 10 minutes continuously?<br><i>[INSERT EXAMPLES]</i><br><i>(USE SHOWCARD)</i> | Yes 1                                                                   |
|                         | No 2 <i>If No, go to P 4</i>                                                                                                                                                                                                                                                     | P1                                                                      |
| 2                       | In a typical week, on how many days do you do vigorous-intensity activities as part of your work?                                                                                                                                                                                | Number of days <input type="text"/>                                     |
| 3                       | How much time do you spend doing vigorous-intensity activities at work on a typical day?                                                                                                                                                                                         | Hours : minutes <input type="text"/> : <input type="text"/><br>hrs mins |
| 4                       | Does your work                                                                                                                                                                                                                                                                   |                                                                         |

|                                                                                                                                                                                                                                                                                           |                                                                                                                                                                                                                                              |                             |                                             |             |
|-------------------------------------------------------------------------------------------------------------------------------------------------------------------------------------------------------------------------------------------------------------------------------------------|----------------------------------------------------------------------------------------------------------------------------------------------------------------------------------------------------------------------------------------------|-----------------------------|---------------------------------------------|-------------|
|                                                                                                                                                                                                                                                                                           | involve moderate-intensity activity that causes small increases in breathing or heart rate such as brisk walking <i>[or carrying light loads]</i> for at least 10 minutes continuously?<br><i>[INSERT EXAMPLES]</i><br><i>(USE SHOWCARD)</i> | Yes 1<br>No 2               | <i>If No, go to P 7</i>                     | P4          |
| 5                                                                                                                                                                                                                                                                                         | In a typical week, on how many days do you do moderate-intensity activities as part of your work?                                                                                                                                            | Number of days              | <input type="text"/>                        | P5          |
| 6                                                                                                                                                                                                                                                                                         | How much time do you spend doing moderate-intensity activities at work on a typical day?                                                                                                                                                     | Hours : minutes<br>hrs mins | <input type="text"/> : <input type="text"/> | P6<br>(a-b) |
| <b>Travel to and from places</b>                                                                                                                                                                                                                                                          |                                                                                                                                                                                                                                              |                             |                                             |             |
| The next questions exclude the physical activities at work that you have already mentioned.<br>Now I would like to ask you about the usual way you travel to and from places. For example to work, for shopping, to market, to place of worship. <i>[insert other examples if needed]</i> |                                                                                                                                                                                                                                              |                             |                                             |             |
| 7                                                                                                                                                                                                                                                                                         | Do you walk or use a bicycle ( <i>pedal cycle</i> ) for at least 10 minutes continuously to get to and from places?                                                                                                                          | Yes 1                       |                                             | P7          |
|                                                                                                                                                                                                                                                                                           |                                                                                                                                                                                                                                              | No 2                        | <i>If No, go to P 10</i>                    |             |
| 8                                                                                                                                                                                                                                                                                         | In a typical week, on how many days do you walk or bicycle for at least 10 minutes continuously to get to and from places?                                                                                                                   | Number of days              | <input type="text"/>                        | P8          |
| 9                                                                                                                                                                                                                                                                                         | How much time do you spend walking                                                                                                                                                                                                           | Hours : minutes<br>hrs mins | <input type="text"/> : <input type="text"/> | P9<br>(a-b) |

|                                                                                                                                                                                                                 |                                                                                                                                                                                                                                                               |                                                                         |              |
|-----------------------------------------------------------------------------------------------------------------------------------------------------------------------------------------------------------------|---------------------------------------------------------------------------------------------------------------------------------------------------------------------------------------------------------------------------------------------------------------|-------------------------------------------------------------------------|--------------|
|                                                                                                                                                                                                                 | or bicycling for travel on a typical day?                                                                                                                                                                                                                     |                                                                         |              |
| <b>Recreational activities</b>                                                                                                                                                                                  |                                                                                                                                                                                                                                                               |                                                                         |              |
| The next questions exclude the work and transport activities that you have already mentioned. Now I would like to ask you about sports, fitness and recreational activities (leisure), [insert relevant terms]. |                                                                                                                                                                                                                                                               |                                                                         |              |
| 10                                                                                                                                                                                                              | Do you do any vigorous-intensity sports, fitness or recreational ( <i>leisure</i> ) activities that cause large increases in breathing or heart rate like [running or football,] for at least 10 minutes continuously?<br>[INSERT EXAMPLES]<br>(USE SHOWCARD) | Yes 1<br>No 2 If No, go to P 13                                         | P10          |
| 11                                                                                                                                                                                                              | In a typical week, on how many days do you do vigorous-intensity sports, fitness or recreational ( <i>leisure</i> ) activities?                                                                                                                               | Number of days <input type="text"/>                                     | P11          |
| 12                                                                                                                                                                                                              | How much time do you spend doing vigorous-intensity sports, fitness or recreational activities on a typical day?                                                                                                                                              | Hours : minutes <input type="text"/> : <input type="text"/><br>hrs mins | P12<br>(a-b) |
| 13                                                                                                                                                                                                              | Do you do any moderate-intensity sports, fitness or recreational ( <i>leisure</i> ) activities that causes a small increase in breathing or heart rate such as brisk                                                                                          | Yes 1<br>No 2 If No, go to P16                                          | P13          |

|                                                                                                                                                                                                                                                                                                                                           |                                                                                                                            |                                                                      |              |
|-------------------------------------------------------------------------------------------------------------------------------------------------------------------------------------------------------------------------------------------------------------------------------------------------------------------------------------------|----------------------------------------------------------------------------------------------------------------------------|----------------------------------------------------------------------|--------------|
|                                                                                                                                                                                                                                                                                                                                           | walking,(cycling, swimming, volleyball)for at least 10 minutes continuously?<br>[INSERT EXAMPLES] (USE SHOWCARD)           |                                                                      |              |
| 14                                                                                                                                                                                                                                                                                                                                        | In a typical week, on how many days do you do moderate-intensity sports, fitness or recreational (leisure) activities?     | Number of days<br><br>_ _                                            | P14          |
| 15                                                                                                                                                                                                                                                                                                                                        | How much time do you spend doing moderate-intensity sports, fitness or recreational (leisure) activities on a typical day? | Hours : minutes      _ _ : _ _<br><br>hrs                      mins  | P15<br>(a-b) |
| <b>Sedentary behaviour</b>                                                                                                                                                                                                                                                                                                                |                                                                                                                            |                                                                      |              |
| The following question is about sitting or reclining at work, at home, getting to and from places, or with friends including time spent [sitting at a desk, sitting with friends, travelling in car, bus, train, reading, playing cards or watching television], but do not include time spent sleeping. [INSERT EXAMPLES] (USE SHOWCARD) |                                                                                                                            |                                                                      |              |
| 16                                                                                                                                                                                                                                                                                                                                        | How much time do you usually spend sitting or reclining on a typical day?                                                  | Hours : minutes      _ _ : _ _<br><br>hrs                      min s | P16<br>(a-b) |
